# Supplementary material for: Unbend, correction of local beam-induced sample motion in cryo-EM images using a 3D spline model
Source: eLife. 2026 Apr 30;14:RP109119. doi: 10.7554/eLife.109119 (PMC13132544; doi:10.7554/eLife.109119)
Supplement: Figure 2—source data 1. [file elife-109119-fig2-data1.xlsx]

## Sheet: Sheet1
Figure 2—Source data 1
Algorithm | Unbend movie alignment and local motion correction
Input: Movie frames and movie frames metadata. Output: Motion-corrected micrograph.
1. Full-frame alignment: Perform three-iteration global alignment (Unblur-style) with increasing resolution. Identify outlier frames by deviation from an SG reference trajectory (>1.5×IQR), re-align outliers with 2×B-factor, and retain raw shifts only if they remain outliers (see Full-frame alignment)
2. Patch trimming: Choose patch size and patch grid (NPx, NPy) based on output pixel size or user settings; partition the globally aligned frames into patch stacks (see Patch alignment)
3. Patch-stack alignment: For each patch, estimate per-frame shifts {(xi,f, yi,f)} by cross-correlation of each frame against the leave-one-out average of the remaining frames. (see Patch alignment)
4. Patch smoothing and repair: Smooth each patch trajectory using an SG filter. Flag unreliable patches using inter-frame shift variability (Eqs. 1–2; 1.5×IQR) and replace their shifts with those from the nearest-neighbor patch. (Patch alignment).
5. Spline model and knot grid: Construct a 3D deformation model using bicubic B-splines in x–y and cubic B-splines along exposure/frame (z), with free-end boundary conditions. Set (NKx, NKy)≈2/3(NPx, NPy) (minimum 4), place z-knots every 4e-/Å2, and maintain knot parameters Kx and Ky. (see Sample distortion modeling and correction: knot grid configuration)
6. Initialize knots: Fit (Kx, Ky) by minimizing the least-squares objective L1 (Eq. 11). (see Sample distortion modeling and correction: Control points and knots)
7. Refine knots: Refine (Kx, Ky) by minimizing the cross-correlation based objective L2 using L-BFGS (Eqs. 12–13). (Sample distortion modeling and correction: Parameter refinement)
8. Warp and sum: Evaluate pixel-wise shifts, warp frames (bilinear interpolation), pad/trim boundaries, and average corrected frames to generate the final micrograph. (see Sample distortion modeling and correction: Parameter refinement)
