# Supplementary material for: Unbend, correction of local beam-induced sample motion in cryo-EM images using a 3D spline model
Source: eLife. 2026 Apr 30;14:RP109119. doi: 10.7554/eLife.109119 (PMC13132544; doi:10.7554/eLife.109119)
Supplement: Figure 4—source data 1. [file elife-109119-fig4-data1.xlsx]

## Sheet: Sheet1
Figure 4—source data 1
Motion and equivalent strain summary table for micrographs shown in Figure 4—figure supplements 1–5
	Max shift (Å)	Mean shift (Å)	Standard deviation (Å)	Von Mises equivalent strain	Total equivalent strain
M. pneumoniae	57.9	17.5	13.7	< 2.3%	< 3.5 %
C. aethiops: BS-C-1 (cell edge)	16.8	7.8	3.9	< 1.0 %	< 1.6 %
M. musculus: ER-HoxB8 lamellae	18.9	8.1	4.6	< 1.0 %	< 1.5 %
S. cerevisiae lamellae	13.2	5.3	3.6	< 0.9 %	< 1.2 %
C. aethiops: BS-C-1 (cell lysate)	9.1	3.4	2.3	< 0.8 %	< 1.2 %
