# Supplementary material for: Unbend, correction of local beam-induced sample motion in cryo-EM images using a 3D spline model
Source: eLife. 2026 Apr 30;14:RP109119. doi: 10.7554/eLife.109119 (PMC13132544; doi:10.7554/eLife.109119)
Supplement: Figure 4—source data 2. [file elife-109119-fig4-data2.xlsx]

## Sheet: Sheet1
Figure 4—source data 2
Summary statistics of per-micrograph mean patch shifts by sample type
Sample	Mean (Å)	Standard deviation (Å)	Min (Å)	Max (Å)	Median (Å)
M. pneumoniae	4.31	2.17	0.27	17.46	4.1
BS-C-1 (cell edge)	2.45	1.7	0.39	7.78	2.35
S. cerevisiae (lamella)	1.44	1.04	0.28	5.3	1.24
ER-HoxB8 (lamella)	2.48	1.68	0.5	8.1	2.04
BS-C-1 (cell lysate)	0.72	0.67	0.29	3.44	0.49
For each micrograph, the mean patch shift was computed across patches; the table reports summary statistics of these per-micrograph means for each dataset.
