# Supplementary material for: Unbend, correction of local beam-induced sample motion in cryo-EM images using a 3D spline model
Source: eLife. 2026 Apr 30;14:RP109119. doi: 10.7554/eLife.109119 (PMC13132544; doi:10.7554/eLife.109119)
Supplement: Figure 8—source data 1. [file elife-109119-fig8-data1.xlsx]

## Sheet: Sheet1
Figure 8—source data 1
Statistics table for detected particles from micrographs processed by different software
M. pneumoniae
Method	2DTM SNR (mean)	2DTM SNR (median)	Detections per micrograph (mean)	Detections per micrograph (median)	Total detections	Common detections with Unbend	Fraction of overlap (Unbend having higher SNR) (%)	Fraction of overlap (Unbend having lower SNR) (%)	Fraction of overlap. (Unbend having same SNR) (%)
Unbend	8.72	8.53	79.7	81	4864
MotionCor2	8.7	8.52	70.6	73	4450	3793	53.2	46.1	0.7
MotionCor3	8.67	8.47	67.2	69.5	4167	3559	57.1	42.1	0.8
Warp	8.64	8.47	60.7	57.5	3761	3217	62.2	37	0.8
CryoSPARC	8.65	8.45	50.4	49	3025	2410	59.1	40.1	0.8
BS-C-1 (cell edge)
Unbend	10.46	10.26	70.6	53.5	4521
MotionCor2	10.18	9.98	67.8	50.5	4336	4191	71.6	28.1	0.4
MotionCor3	10.14	9.94	68.1	53	4293	4162	74.3	25.3	0.4
Warp	10.2	10	67.6	50	4324	4180	70.6	28.6	0.8
CryoSPARC	10.08	9.85	65.6	50.5	4197	3931	73.5	25.9	0.5
S. Cerevisiae (lamella)
Unbend	10.65	10.51	407.4	408.5	12223
MotionCor2	10.63	10.48	406.4	406	12192	11785	49.9	49.4	0.7
MotionCor3	10.52	10.4	404.1	411	12122	11741	54.8	44.6	0.6
Warp	9.85	9.66	361.4	347.5	10842	10664	89.4	10.4	0.2
CryoSPARC	10.69	10.56	415.6	413.5	12469	11436	44.2	55.4	0.5
ER-HoxB8 (lamella)
Unbend	11.46	11.35	10.7	10	407
MotionCor2	11.27	11.26	9.7	8	416	389	58.9	40.4	0.8
MotionCor3	11.3	11.23	9.7	7.5	406	388	63.7	35.8	0.5
Warp	10.82	10.83	10.1	9	395	369	81.8	17.6	0.5
CryoSPARC	10.84	10.74	9.4	7	405	345	79.4	20.3	0.3
BS-C-1 (cell lysate)
Unbend	14.24	14.43	38.8	28	2910
MotionCor2	14.12	14.3	38.8	28	2909	2892	58.4	40.5	1
MotionCor3	14.11	14.28	38.8	28	2911	2890	58.7	40.6	0.8
Warp	14.02	14.21	38.8	28	2909	2887	62.8	36.7	0.5
CryoSPARC	13.71	13.93	38.1	28	2899	2875	72.7	26.9	0.5
